# Supplementary material
Source: publisher figshare collection journal article supplement (https://gsajournals.figshare.com/ndownloader/files/21823227)
Supplement: Supplementary file 1 [file 21823227]

**Figure S2**


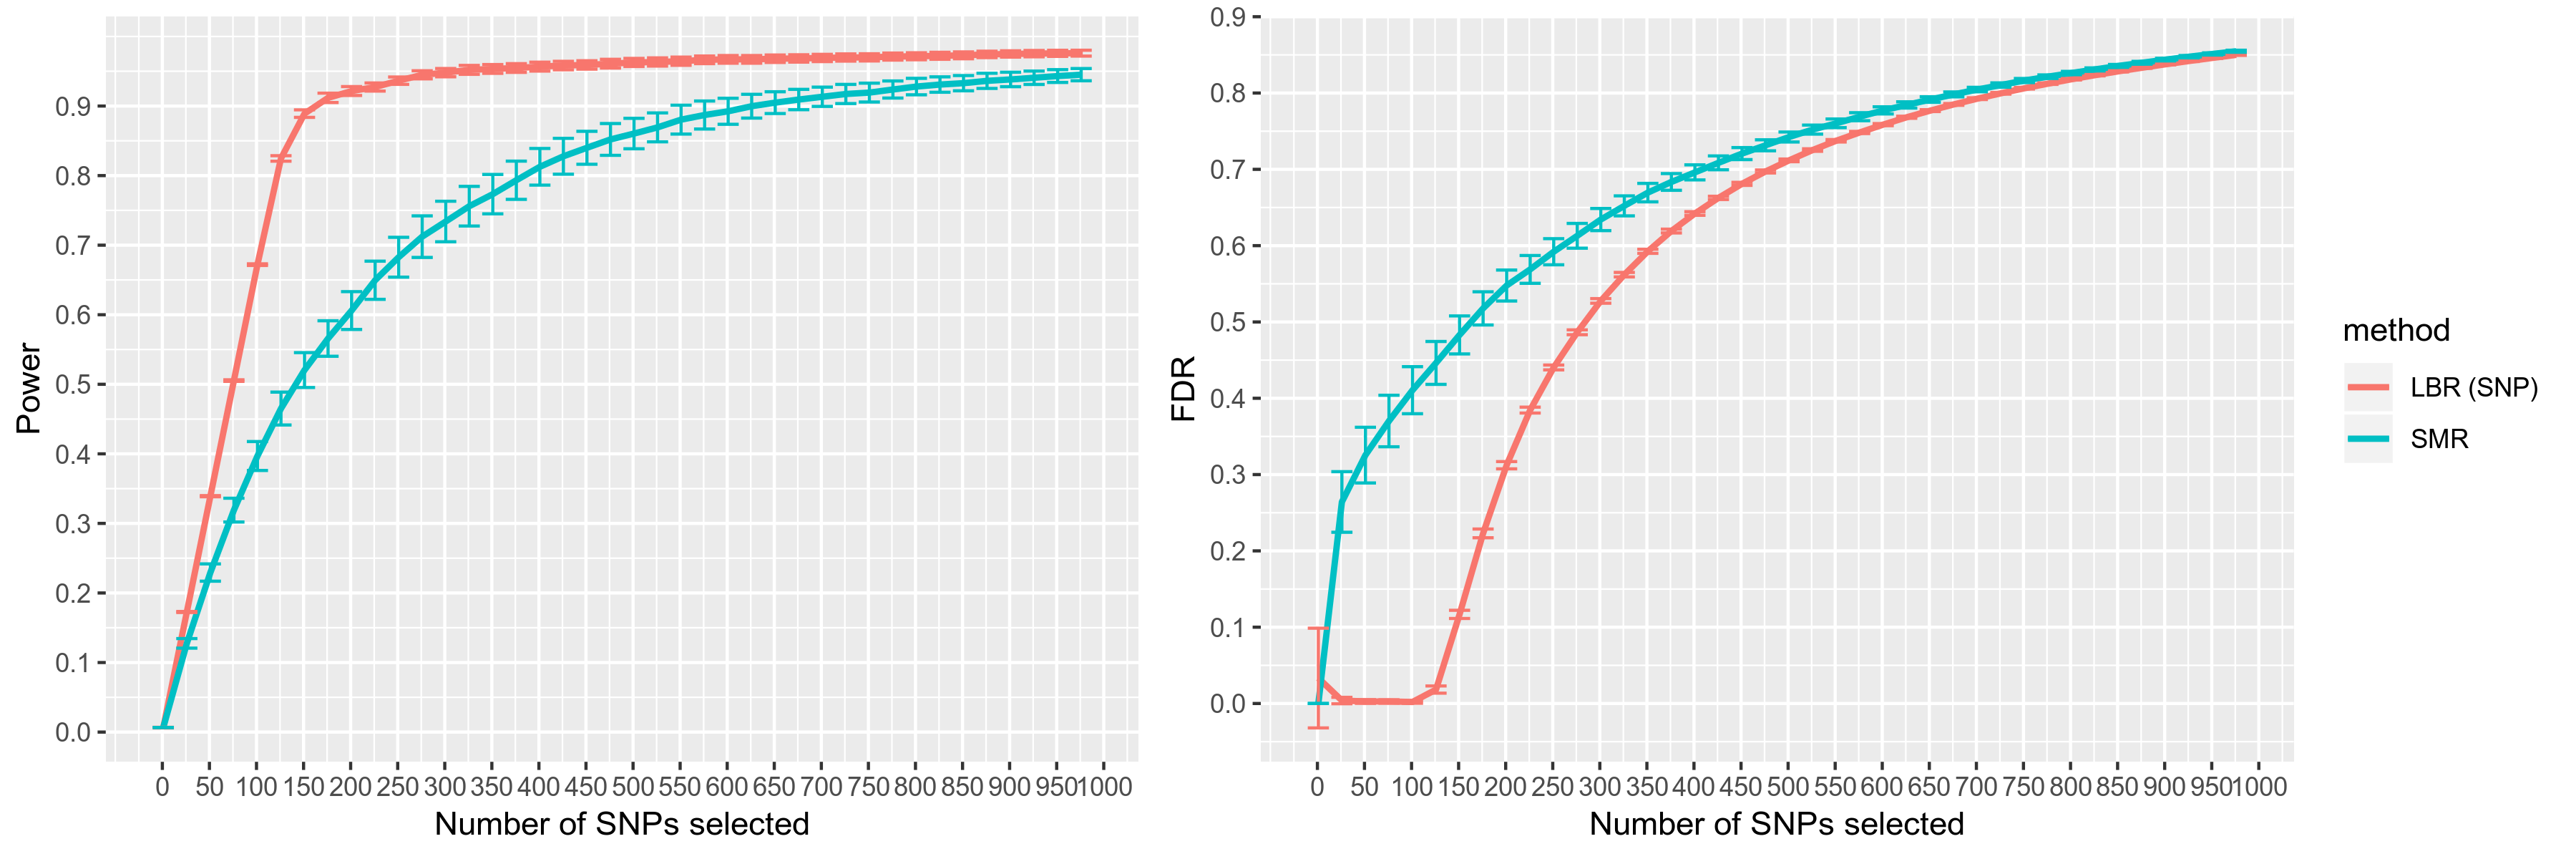


Estimated power and false-discovery rate for discovering observed SNPs with effects in at least one sex.Estimated power (left) and FDR (right) shown as a function of the number of SNPs selected. Each point represents a sample average and error bars represent 95% confidence intervals, each derived using 30 Monte Carlo replicates. LBR (SNP): local Bayesian regression, utilizing . SMR: single-marker regression, utilizing the F-test-based *p-*value.
